# Supplementary material
Source: Springer Nature journal article supplement (https://www.springermedizin.de/resource/supplementary/13023_2012_539_MOESM1_ESM.pdf/9642736)

**% Change, Urine GAG  
(mean SEM)**

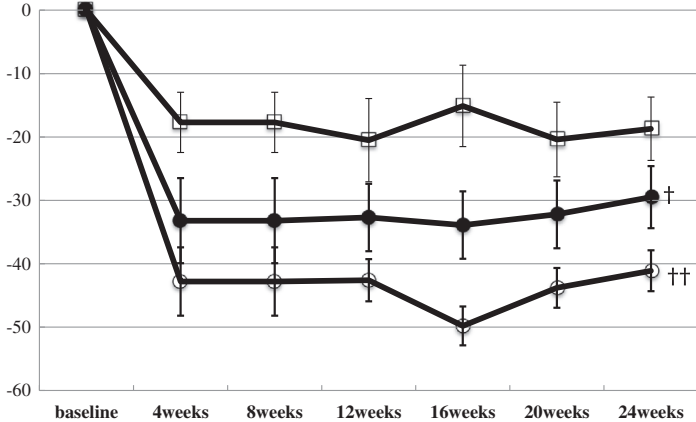

Supplement: MOESM1 [file 9642736]
